# Supplementary material
Source: Springer Nature journal article supplement (https://www.springermedizin.de/resource/supplementary/12889_2010_2607_MOESM5_ESM.pdf/9486690)

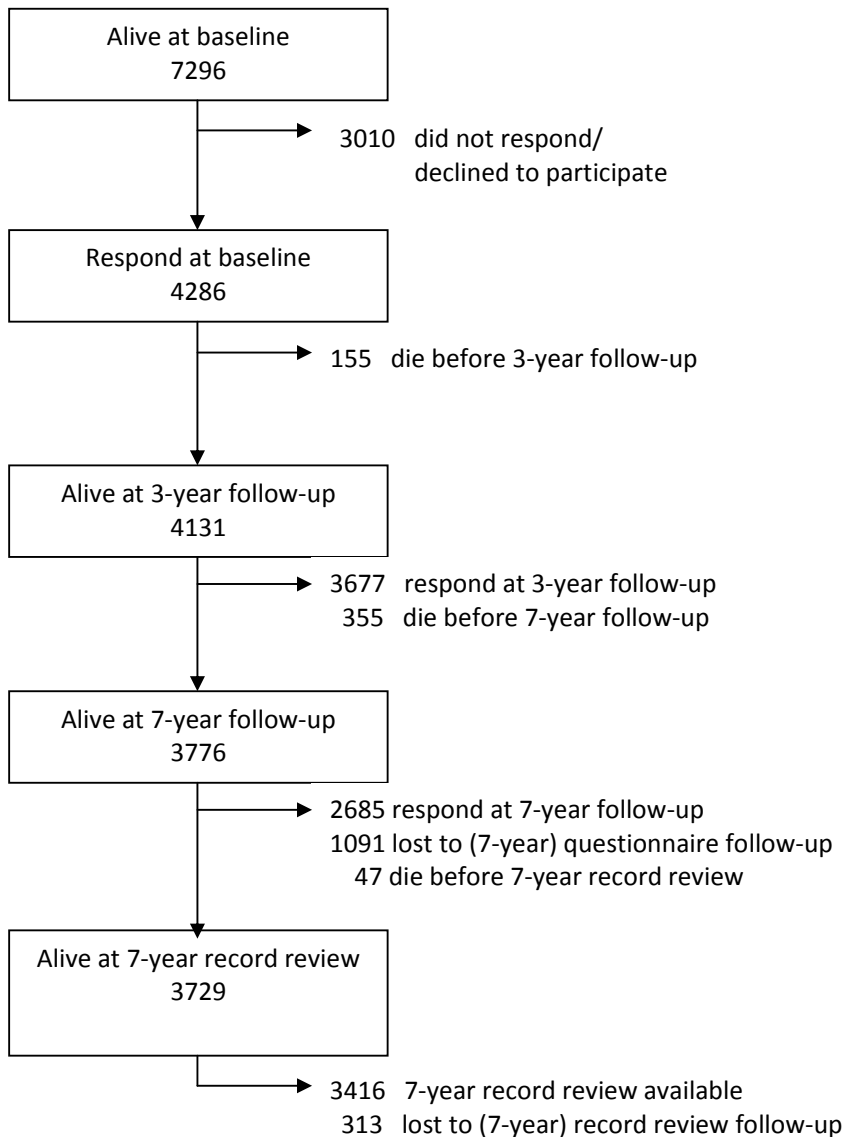

Supplement: MOESM5 [file 9486690]
